# Supplementary material
Source: MDPI journal article supplement (https://www.mdpi.com/1424-2818/13/12/674)

NC\_019628 NC\_019628:1-120546

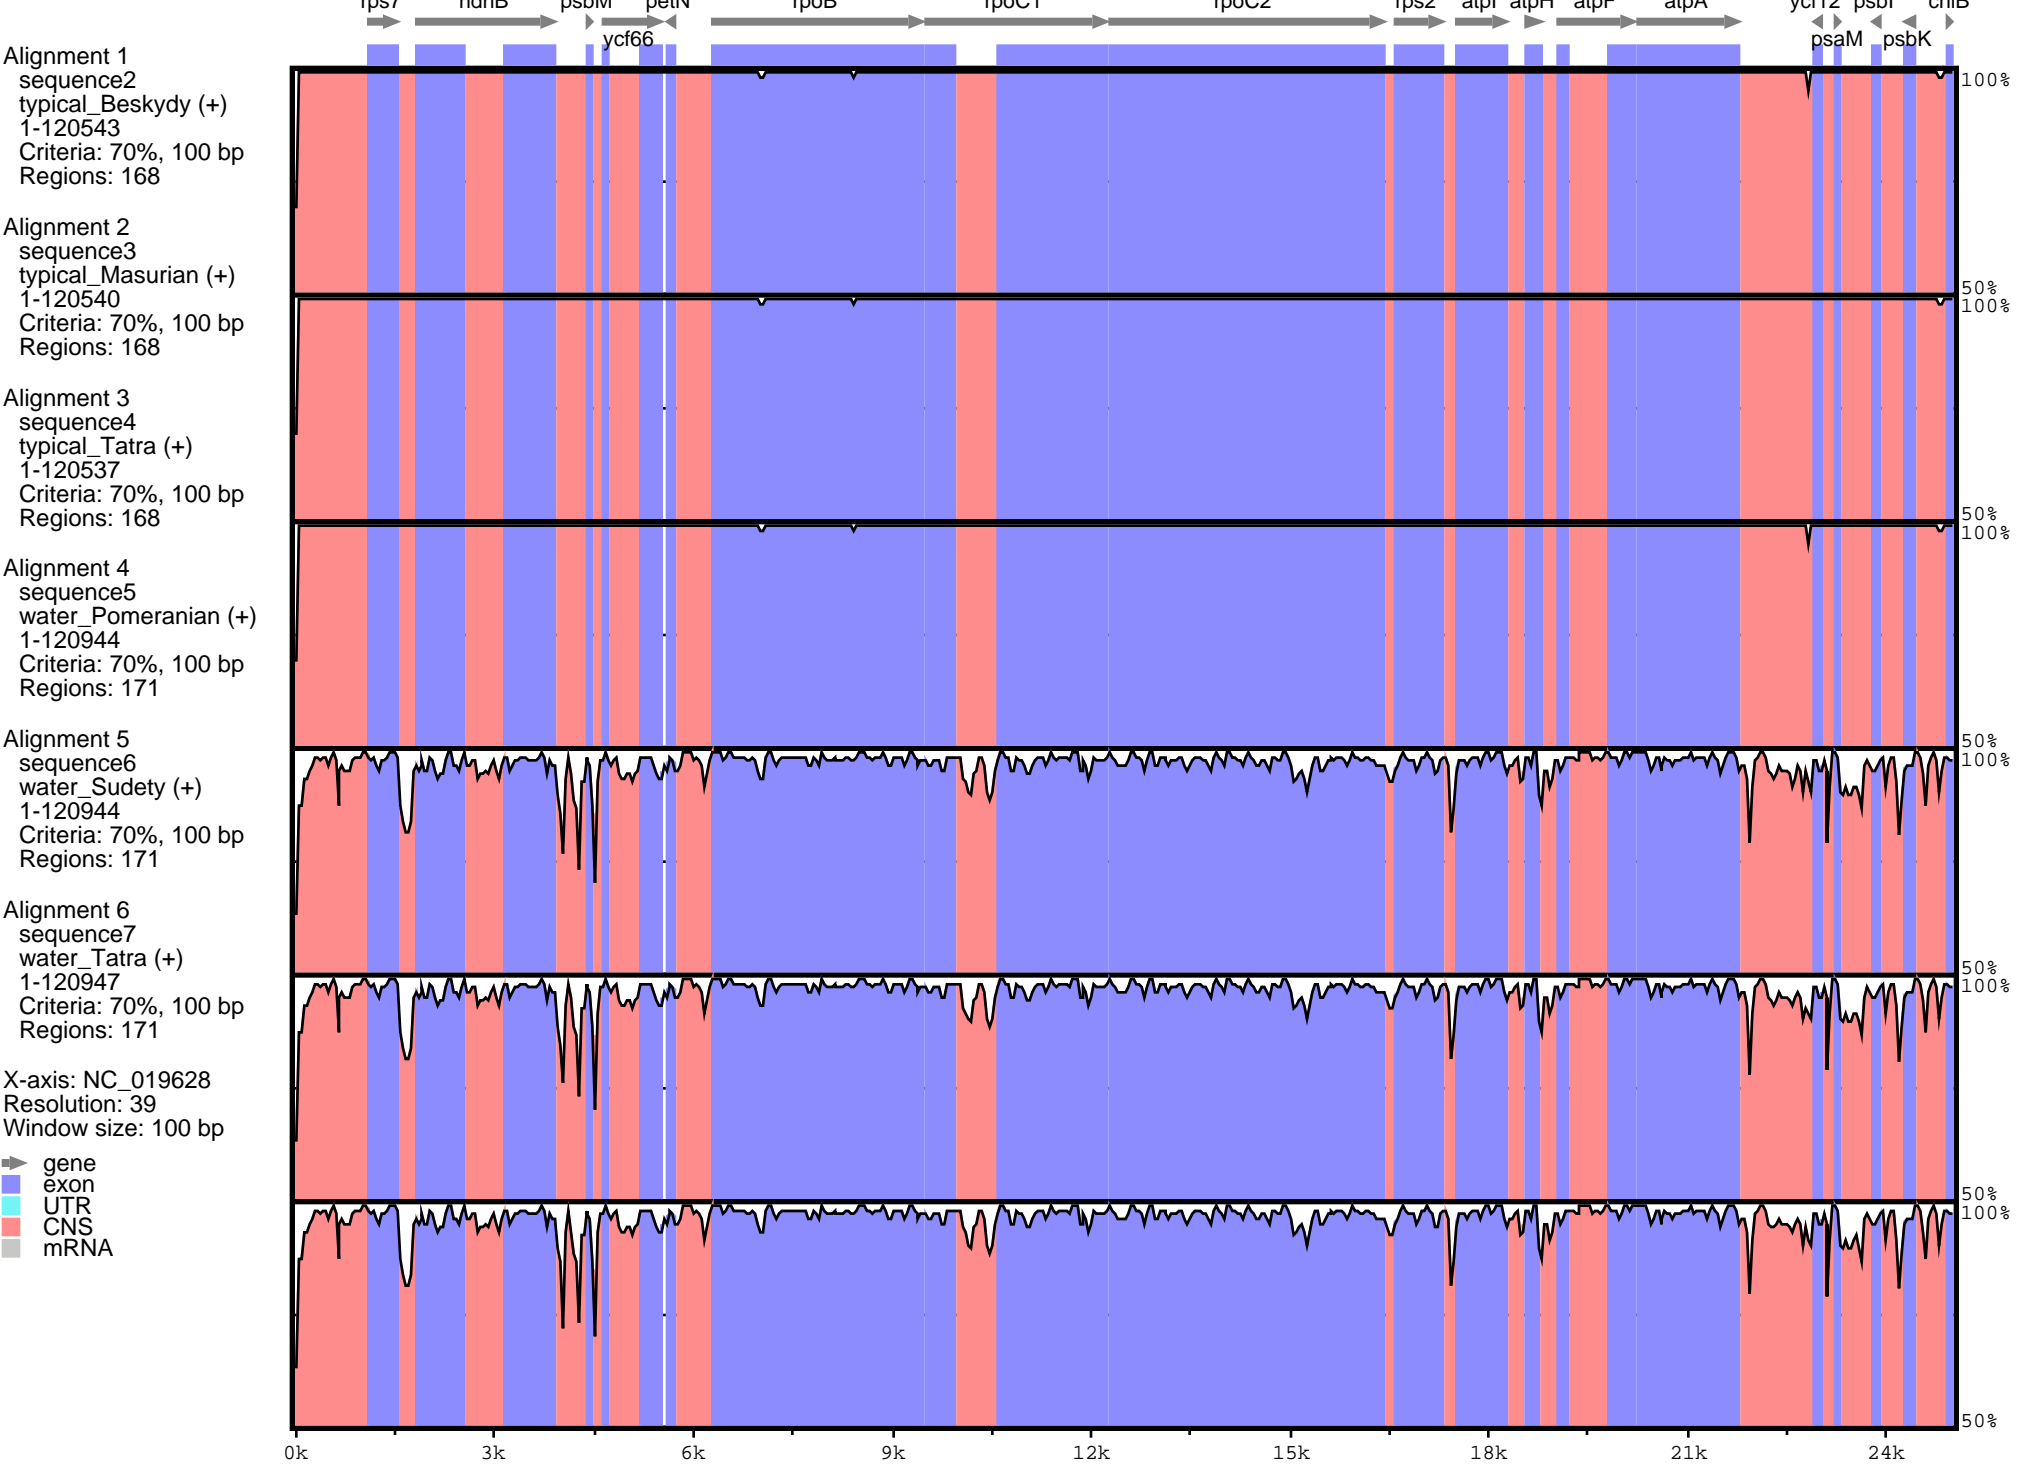

NC\_019628 NC\_019628:1-120546

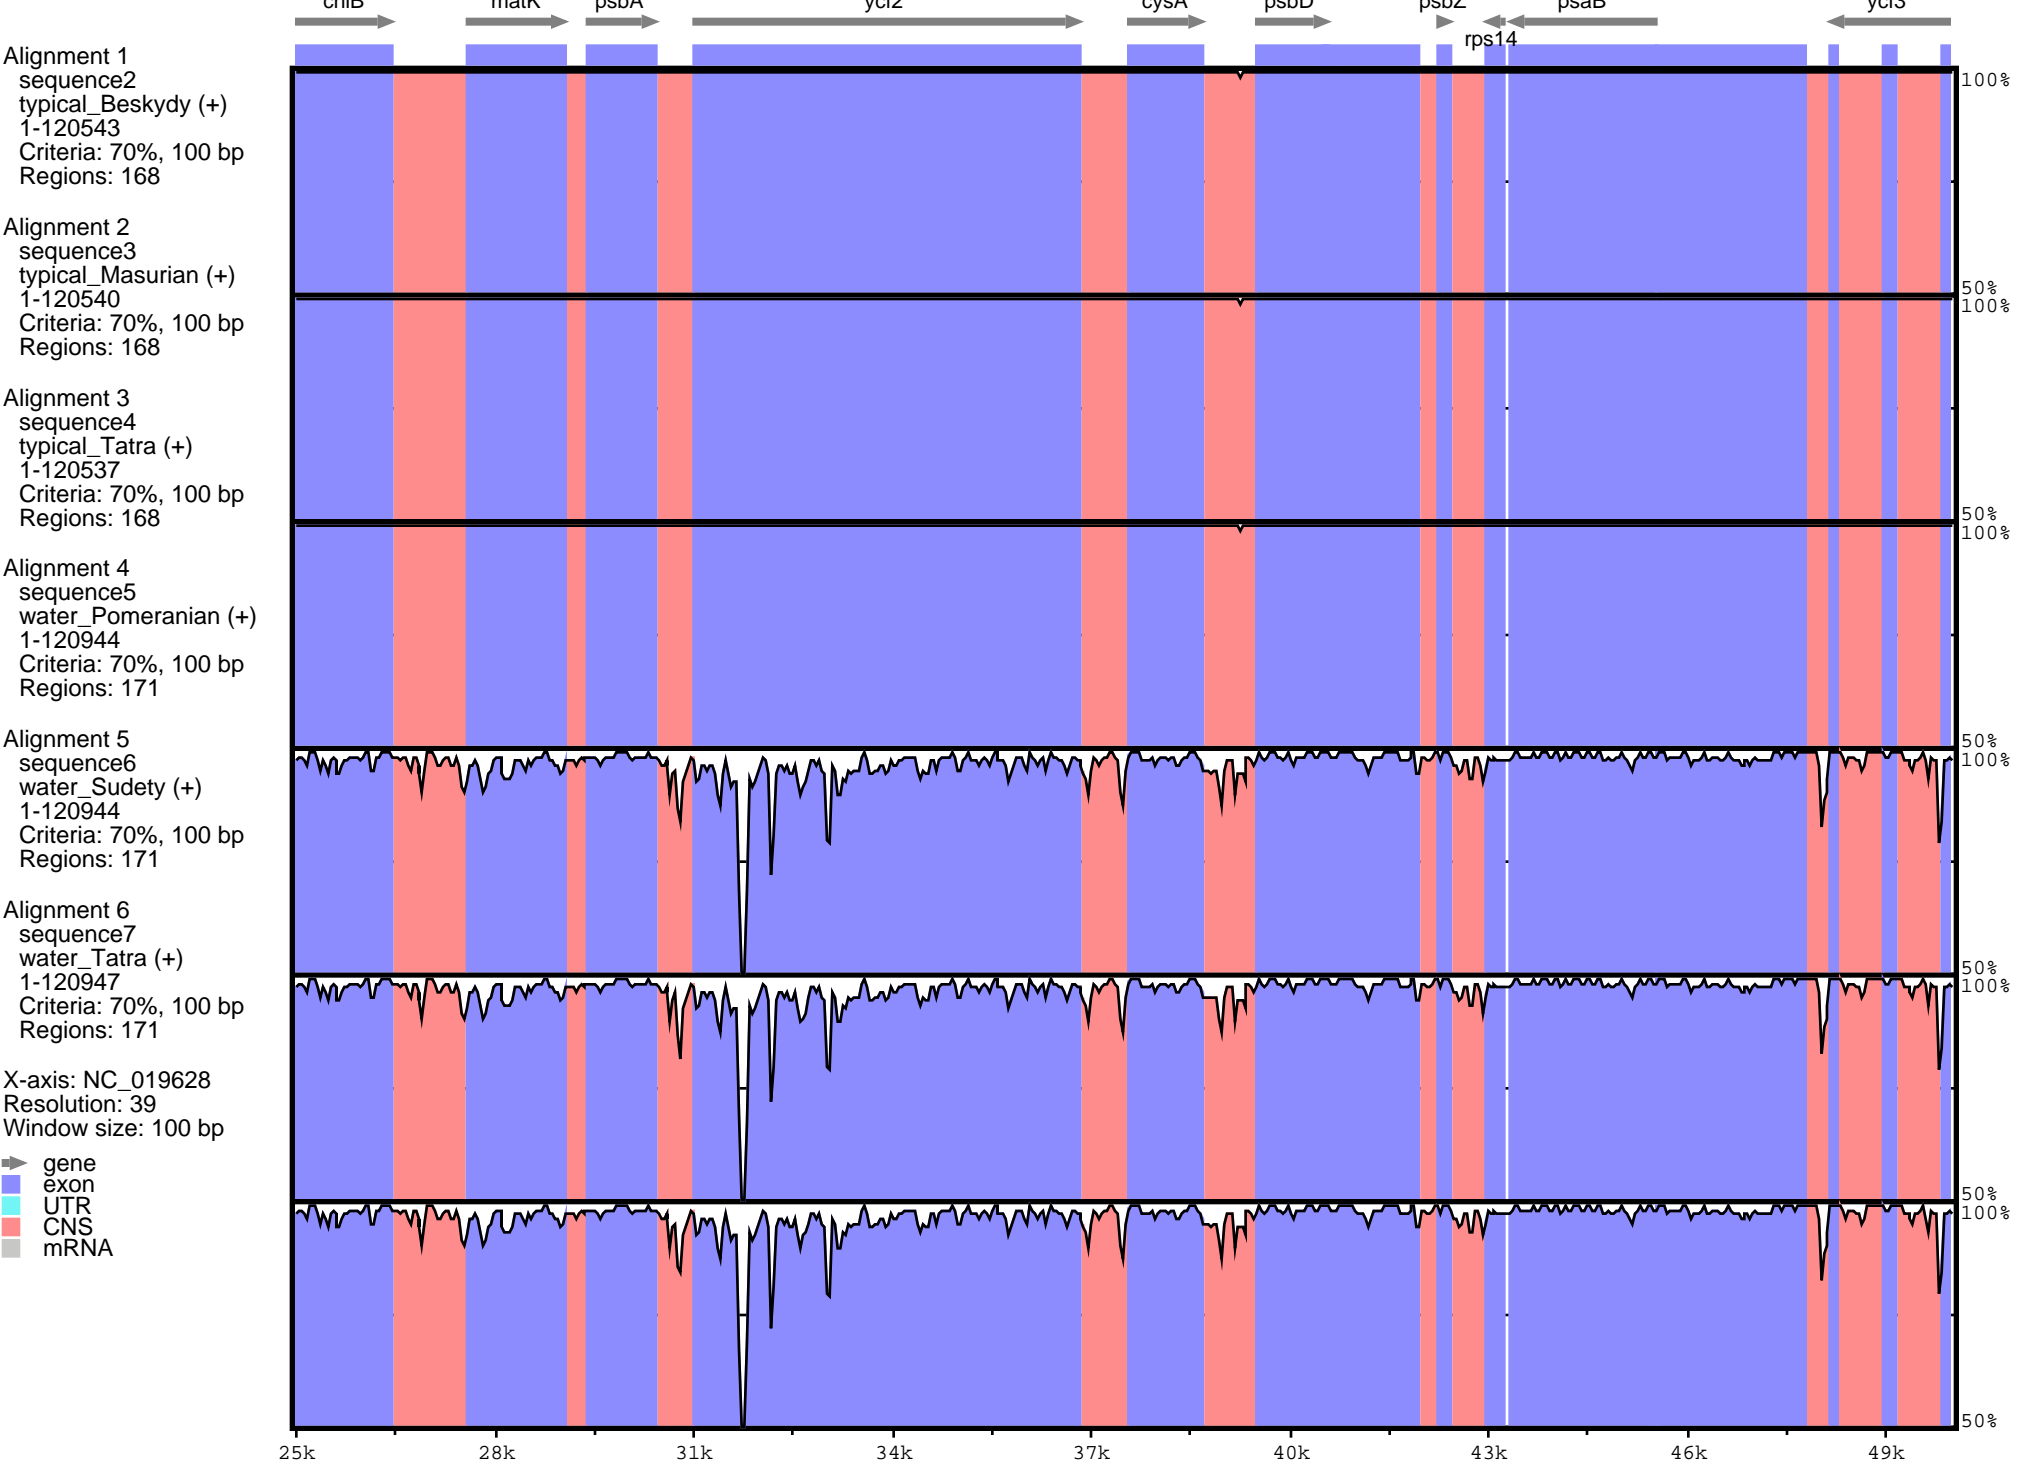

NC\_019628 NC\_019628:1-120546

Alignment 1  
sequence2  
typical\_Beskydy (+)  
1-120543  
Criteria: 70%, 100 bp  
Regions: 168

Alignment 2  
sequence3  
typical\_Masurian (+)  
1-120540  
Criteria: 70%, 100 bp  
Regions: 168

Alignment 3  
sequence4  
typical\_Tatra (+)  
1-120537  
Criteria: 70%, 100 bp  
Regions: 168

Alignment 4  
sequence5  
water\_Pomeranian (+)  
1-120944  
Criteria: 70%, 100 bp  
Regions: 171

Alignment 5  
sequence6  
water\_Sudety (+)  
1-120944  
Criteria: 70%, 100 bp  
Regions: 171

Alignment 6  
sequence7  
water\_Tatra (+)  
1-120947  
Criteria: 70%, 100 bp  
Regions: 171

X-axis: NC\_019628  
Resolution: 39  
Window size: 100 bp

► gene  
■ exon  
■ UTR  
■ CNS  
■ mRNA

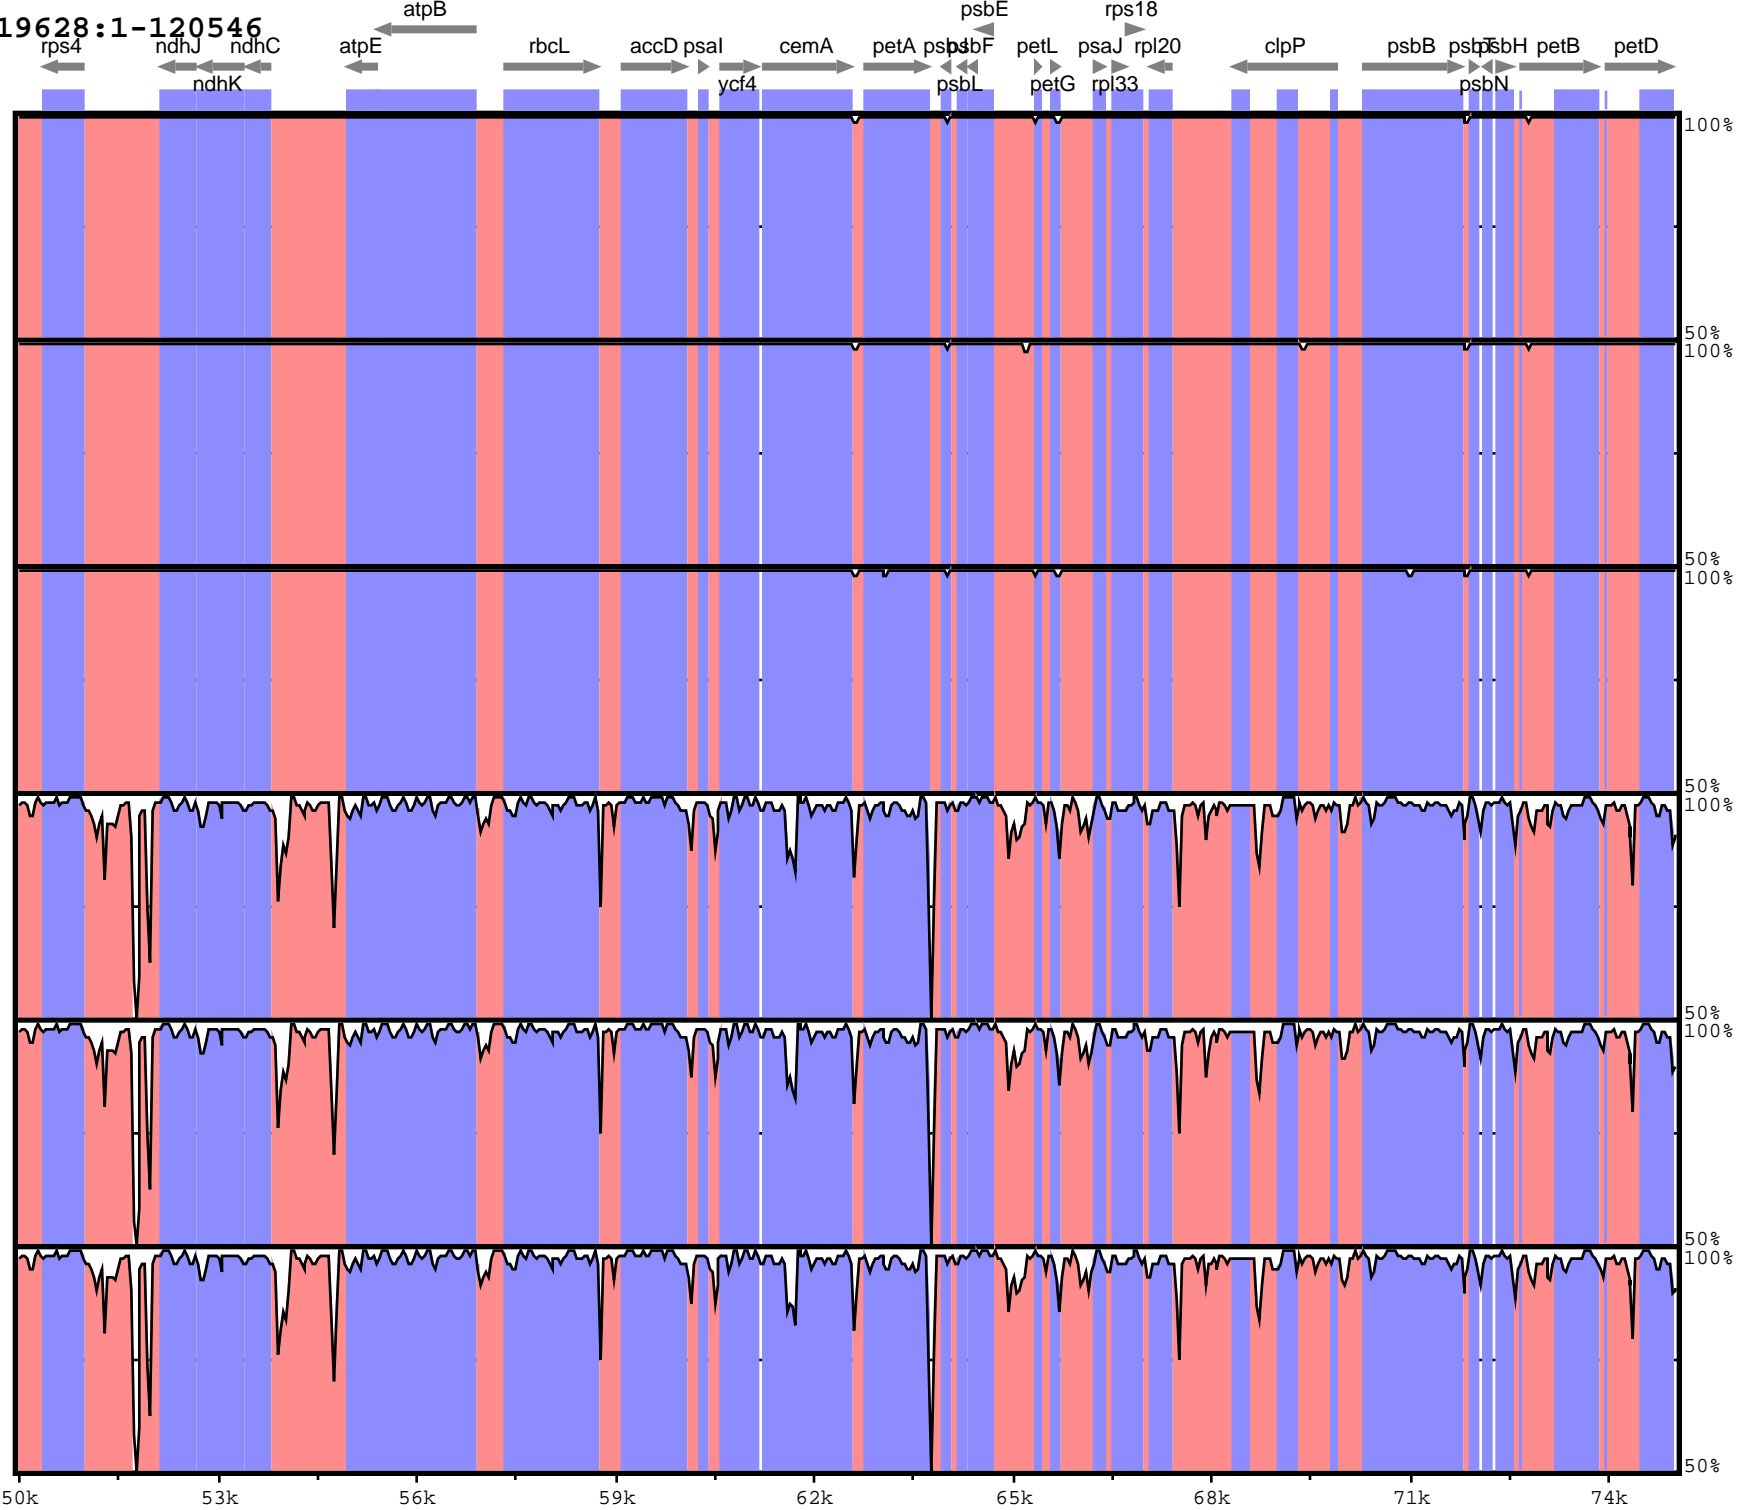

NC\_019628 NC\_019628:1-120546

Alignment 1  
sequence2  
typical\_Beskydy (+)  
1-120543  
Criteria: 70%, 100 bp  
Regions: 168

Alignment 2  
sequence3  
typical\_Masurian (+)  
1-120540  
Criteria: 70%, 100 bp  
Regions: 168

Alignment 3  
sequence4  
typical\_Tatra (+)  
1-120537  
Criteria: 70%, 100 bp  
Regions: 168

Alignment 4  
sequence5  
water\_Pomeranian (+)  
1-120944  
Criteria: 70%, 100 bp  
Regions: 171

Alignment 5  
sequence6  
water\_Sudety (+)  
1-120944  
Criteria: 70%, 100 bp  
Regions: 171

Alignment 6  
sequence7  
water\_Tatra (+)  
1-120947  
Criteria: 70%, 100 bp  
Regions: 171

X-axis: NC\_019628  
Resolution: 39  
Window size: 100 bp

➡ gene  
■ exon  
■ UTR  
■ CNS  
■ mRNA

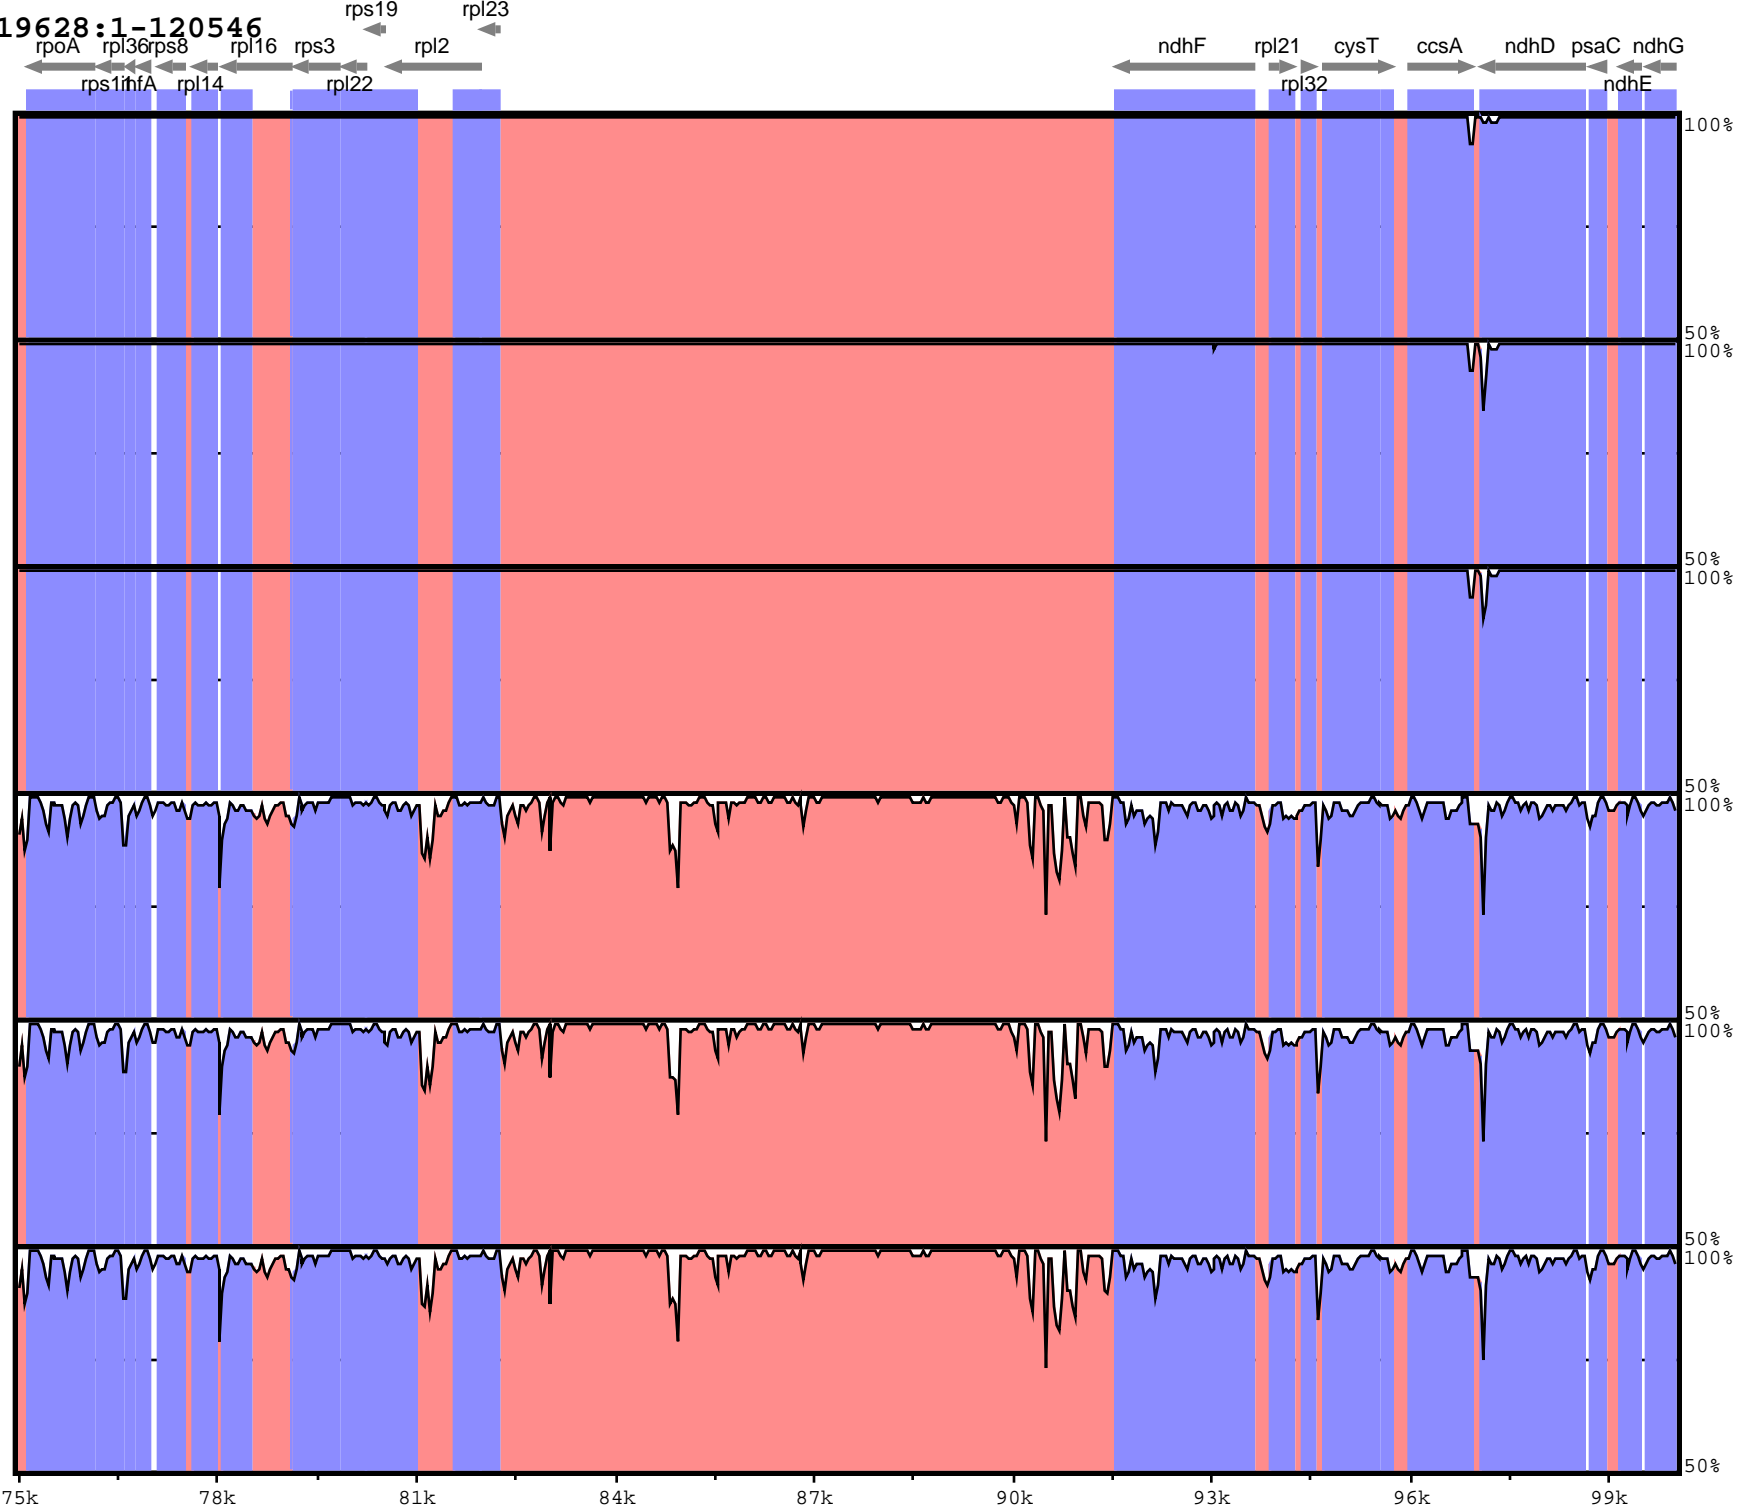

NC\_019628 NC\_019628:1-120543

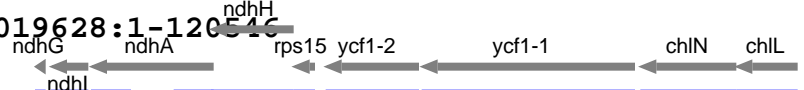

Alignment 1  
sequence2  
typical\_Beskydy (+)  
1-120543  
Criteria: 70%, 100 bp  
Regions: 168

Alignment 2  
sequence3  
typical\_Masurian (+)  
1-120540  
Criteria: 70%, 100 bp  
Regions: 168

Alignment 3  
sequence4  
typical\_Tatra (+)  
1-120537  
Criteria: 70%, 100 bp  
Regions: 168

Alignment 4  
sequence5  
water\_Pomeranian (+)  
1-120944  
Criteria: 70%, 100 bp  
Regions: 171

Alignment 5  
sequence6  
water\_Sudety (+)  
1-120944  
Criteria: 70%, 100 bp  
Regions: 171

Alignment 6  
sequence7  
water\_Tatra (+)  
1-120947  
Criteria: 70%, 100 bp  
Regions: 171

X-axis: NC\_019628  
Resolution: 39  
Window size: 100 bp

- gene
- exon
- UTR
- CNS
- mRNA

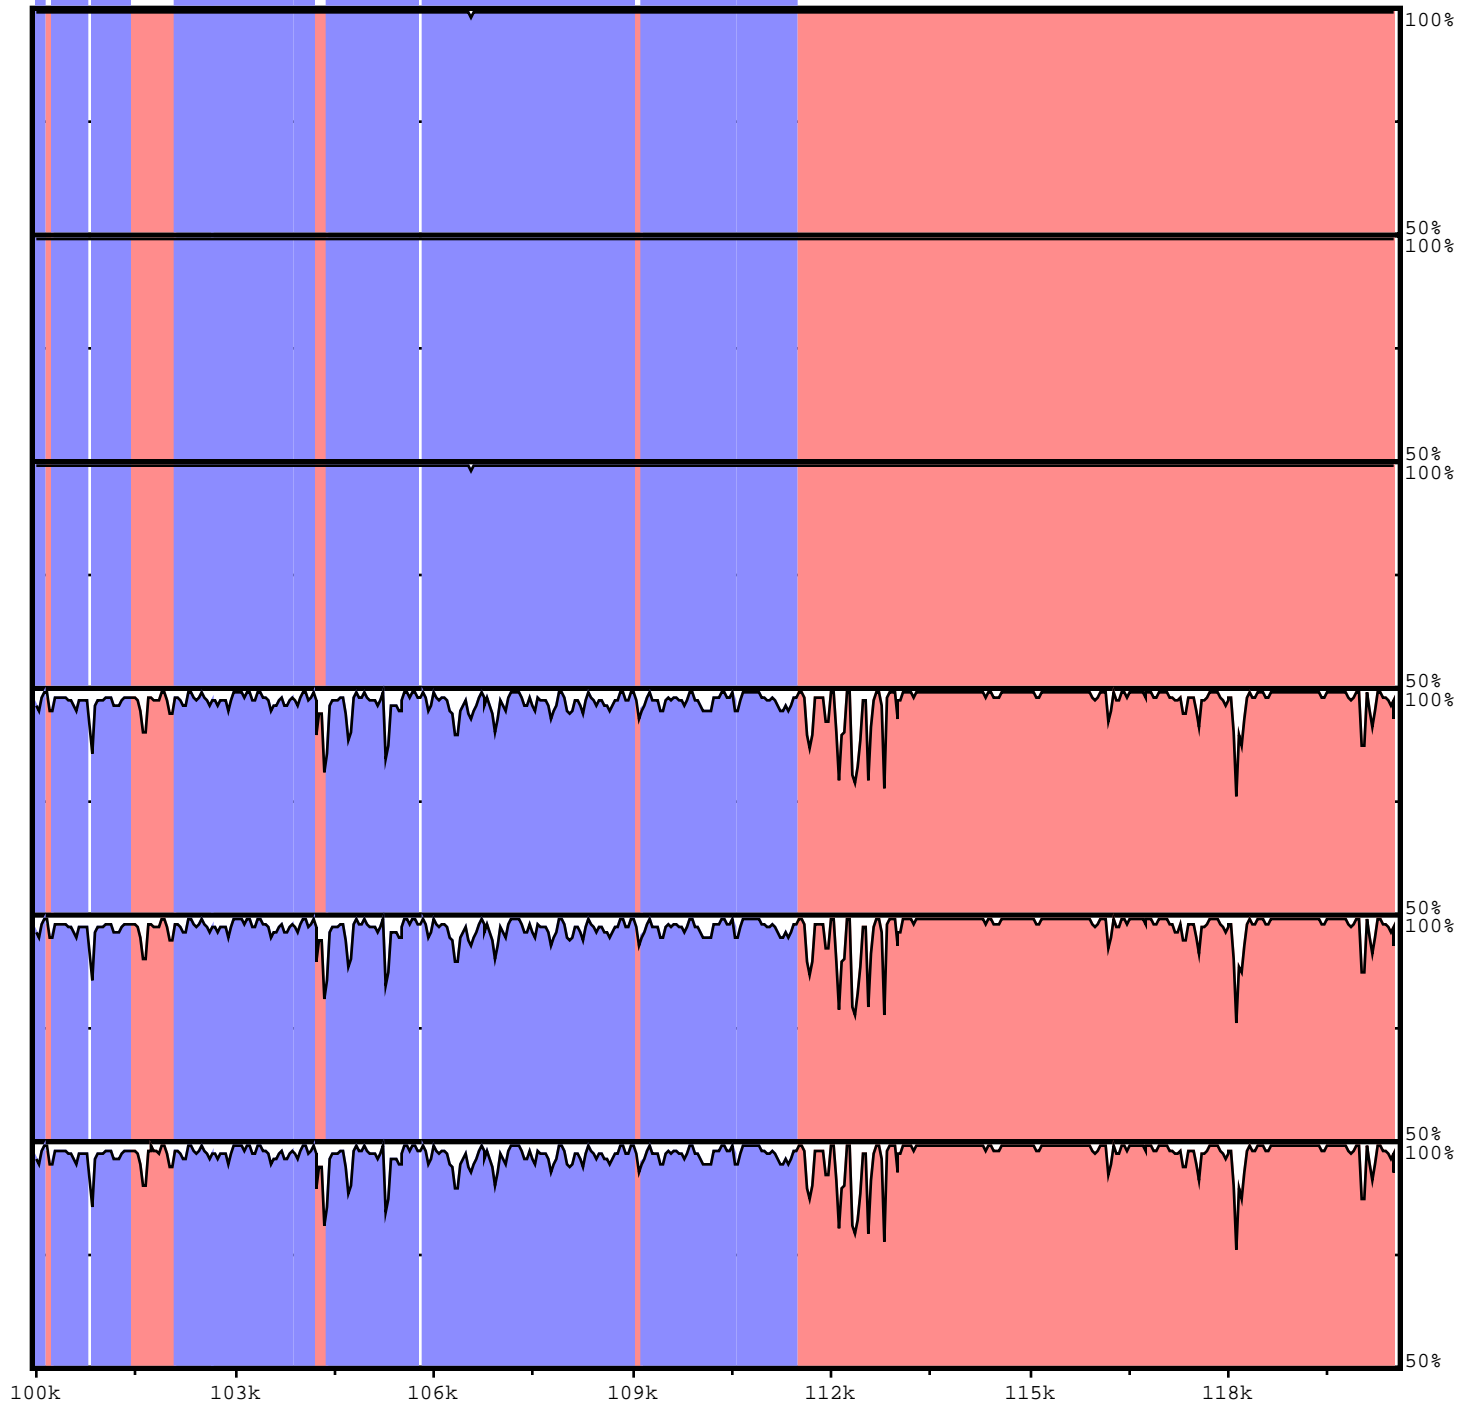

Supplement: s1 [file s1]
